# Supplementary material for: A New Scale for Predicting the Risk of In-hospital Mortality in Patients With Traumatic Spinal Cord Injury
Source: Frontiers journal article supplement (doi:10.3389/fneur.2022.894273), 2022-06-02
Supplement: Data_Sheet_1.PDF [file Data_Sheet_1.PDF]

List of ICD-10-CM Codes for Traumatic Spinal Cord Injury (TSCI) Diagnosis

| <b>ICD-10-CM Code</b> | <b>ICD-10-CM Definition</b>                        |
|-----------------------|----------------------------------------------------|
| S12.001               | First cervical fracture (atlas)                    |
| S12.101               | Second cervical fracture (closed)                  |
| S12.111               | Second cervical fracture (open)                    |
| S12.701               | Multiple cervical fracture with spinal cord injury |
| S12.702               | Multiple fractures of cervical vertebra            |
| S12.901               | Cervical vertebral fracture                        |
| S13.101               | Cervical dislocation                               |
| S13.102               | Atlantoaxial subluxation                           |
| S14.101               | Cervical spinal cord injury                        |
| S22.001               | Thoracic vertebra fracture                         |
| S22.011               | Thoracic vertebra fracture (open)                  |
| S22.101               | Thoracic multiple fracture                         |
| S23.101               | Thoracic vertebra dislocation                      |
| S24.101               | Thoracic spinal cord injury                        |
| S32.001               | Lumbar vertebrae fracture                          |
| S32.701               | Multiple fractures of lumbar vertebrae and pelvis  |
| S33.101               | Lumbar dislocation                                 |
| S34.101               | Lumbar spinal cord injury                          |
| S34.301               | Cauda equina injury                                |
| S34.401               | Sacral spinal cord injury                          |
| S32.101               | Sacral fracture                                    |
| G37.302               | Transverse injury of spinal cord                   |
| T09.302               | Spinal cord injury                                 |

Note: Injury to nerve roots codes not included
